# Supplementary material for: Contribution of Gut Microbiota to Immunological Changes in Alzheimer’s Disease
Source: PubMed Central journal article supplement (PMC8200826; doi:10.3389/fimmu.2021.683068), 2021-05-31
Supplement: DataSheet_1.pdf [file DataSheet_1.pdf]

## Supplementary Material

### Supplementary table 1

|                                                     | AD model | WT model                               | Male/<br>Female | Age<br>(months)                                             | N (Tg/WT)                              |                                                          | Microbiome<br>comparison<br>by                    | Known housing<br>conditions                                                              | Diet                                                                                            | Sequencing<br>method               |
|-----------------------------------------------------|----------|----------------------------------------|-----------------|-------------------------------------------------------------|----------------------------------------|----------------------------------------------------------|---------------------------------------------------|------------------------------------------------------------------------------------------|-------------------------------------------------------------------------------------------------|------------------------------------|
| <b>Brandsch<br/>et al.<br/>(2017)</b> <sup>44</sup> | 5XFAD    | C57BL//6                               | M               | 1.5, 2, 4                                                   | ≥18/18                                 | ≥6 per<br>timepoint per<br>groep                         | Genotype                                          | 12/12h light dark cycle                                                                  | Unlimited food                                                                                  | 16S rRNA<br>amplicon<br>sequencing |
| <b>Harach<br/>et al.<br/>(2017)</b> <sup>45</sup>   | APP/PS1  | C57BL/6                                | M + F           | 8                                                           | 6/7                                    |                                                          | Genotype                                          | SPF conditions,<br>grouped                                                               | Unlimited food                                                                                  | 16S rRNA<br>amplicon<br>sequencing |
| <b>Shen et al.<br/>(2017)</b> <sup>46</sup>         | APP/PS1  | C57BL/6                                | M               | 3, 6, 8                                                     | 6/6 (at each age)                      |                                                          | Genotype,<br>age                                  | SPF conditions, room<br>temperature, 12/12h<br>light-dark circle, caged                  | Unlimited food                                                                                  | 16S rRNA<br>amplicon<br>sequencing |
| <b>Zhang et al.<br/>(2017)</b> <sup>47</sup>        | APP/PS1  | C57BL/6                                | M               | 1,3, 5-6, 8-<br>12                                          | 24/24                                  | 6 per<br>timepoint per<br>group                          | Genotype                                          | SPF conditions,<br>controlled<br>environmental                                           | Unlimited food                                                                                  | 16S rRNA<br>amplicon<br>sequencing |
| <b>Bäuerl et al.<br/>(2018)</b> <sup>48</sup>       | APP/PS1  | C57BL/6                                | F               | 3, 6, 24                                                    | 8/9                                    | (3,3,2 / 3,3,3 at<br>timepoints)                         | Genotype,<br>age                                  | SPF conditions, room<br>temperature, 12/12h<br>light-dark cycle                          | Unlimited food                                                                                  | 16S rRNA<br>amplicon<br>sequencing |
| <b>Xin et al.<br/>(2018)</b> <sup>49</sup>          | APP/PS1  | C57BL/6                                | M               | 2                                                           | 10/10                                  |                                                          | Genotype,<br>OMO<br>treatment                     | 25°C, 12/12h light-dark<br>cycle, housed in pairs                                        | Unlimited food                                                                                  | 16S rRNA<br>amplicon<br>sequencing |
| <b>Abraham<br/>et al.<br/>(2019)</b> <sup>50</sup>  | APP/PS1  | C57BL/6                                | M               | 8                                                           | 8/unknown                              |                                                          | Genotype,<br>probiotic +<br>exercise<br>treatment | Unknown                                                                                  | Unlimited food                                                                                  | Ion PGM<br>Sequencing              |
| <b>Sun et al.<br/>(2019)</b> <sup>51</sup>          | P301L    | FVB/N                                  | M + F           | 3, 6, 10                                                    | 32/32                                  | (8 per<br>timepoint)                                     | Genotype                                          | SPF conditions, 12/12h<br>light-dark circle                                              | Unlimited food                                                                                  | 16S rRNA<br>amplicon<br>sequencing |
| <b>Wang et al.<br/>(2019)</b> <sup>52</sup>         | APP/PS1  | C57BL/6                                | M               | 9                                                           | 6/6                                    |                                                          | Genotype,<br>JAT treatment                        | Air-conditioned room,<br>>12 hours of night in<br>light-dark cycle                       | Unlimited food                                                                                  | 16S rRNA<br>amplicon<br>sequencing |
| <b>Wang, X.<br/>et al.<br/>(2019)</b> <sup>53</sup> | 5XFAD    | C57BL/6                                | M + F           | 2-9                                                         | 4-10/4-10 (at different<br>ages)       |                                                          | Genotype (at<br>7 months),<br>age                 | Room temperature,<br>12/12h light-dark cycle                                             | Differs over<br>course of<br>experiment, food<br>is limited before<br>behavioral<br>experiments | 16S rRNA<br>amplicon<br>sequencing |
| <b>Cox et al.<br/>(2019)</b> <sup>54</sup>          | Tg2576   | Swiss<br>Webster<br>DBA/C57B<br>L/6 F1 | M + F           | 5-15 (mice<br>are<br>followed<br>with<br>increasing<br>age) | 15-17/15-17 (at the starting<br>point) |                                                          | Genotype,<br>age, seks, CR<br>diet                | Temperature<br>controlled conditions,<br>12/12h light-dark cycle                         | Unlimited food<br>(Animals on CR<br>diet are not<br>included here)                              | 16S rRNA<br>amplicon<br>sequencing |
| <b>Chen et al.<br/>(2020)</b> <sup>55</sup>         | APP/PS1  | C57BL/6                                | M               | 1,2,3,6,9                                                   | 121/97                                 | (21,24,24,34,18<br>/<br>14,17,17,31,18<br>at timepoints) | Genotype                                          | SPF conditions, 24°C,<br>12/12h light-dark<br>cycle, caged per 4 (WT<br>and Tg together) | Unlimited food                                                                                  | 16S rRNA<br>amplicon<br>sequencing |

**Supplementary table 1: Characteristics of animal studies regarding microbiota composition in AD mouse models compared to WT.** The used AD mouse model and corresponding WT model is listed together with male/female ratio, age of the animals, sample size, reported comparison, known housing conditions, diet and the used sequencing technique per study.

Supplementary table 2

|                 | Increased in AD mouse models                                                                 | Decreased in AD mouse models                                                                    |
|-----------------|----------------------------------------------------------------------------------------------|-------------------------------------------------------------------------------------------------|
| <b>Phyla</b>    | Firmicutes <sup>44</sup> (2) <sup>48*</sup> , <sup>49</sup> , <sup>52</sup> , <sup>53*</sup> | Bacteroidetes <sup>44</sup> (2) <sup>48*</sup> , <sup>49</sup> , <sup>52</sup> , <sup>53*</sup> |
|                 | Bacteroidetes <sup>45</sup> , <sup>51</sup> , <sup>54*</sup> (F)                             | Firmicutes <sup>45</sup> , <sup>51</sup> , <sup>54*</sup> (F)                                   |
|                 | Deferribacteres <sup>49</sup> , <sup>52</sup>                                                | Verrucomicrobia <sup>45</sup> , <sup>52</sup> , <sup>53*</sup>                                  |
|                 | Tenericutes <sup>45</sup>                                                                    | Actinobacteria <sup>45</sup> , <sup>51</sup>                                                    |
|                 | Proteobacteria <sup>47</sup> (5) <sup>48</sup> (6) <sup>55</sup> (9)                         | Tenericutes <sup>51</sup> (10) <sup>52</sup>                                                    |
|                 | Verrucomicrobia <sup>47</sup> (8) <sup>55</sup> (2,6,9)                                      | Proteobacteria <sup>45</sup>                                                                    |
|                 | Actinobacteria (2) <sup>55</sup>                                                             | Cyanobacteria <sup>49</sup>                                                                     |
| <b>Families</b> | Lachnospiraceae <sup>49</sup> , <sup>52</sup>                                                | Erysipelotrichaceae <sup>49</sup> , <sup>52</sup>                                               |
|                 | Deferribacteraceae <sup>49</sup> , <sup>52</sup>                                             | Prevotellaceae <sup>49</sup> , <sup>52</sup>                                                    |
|                 | Helicobacteriaceae <sup>46</sup> , <sup>52</sup>                                             | Coriobacteriaceae <sup>49</sup> , <sup>51</sup> (10)                                            |
|                 | Desulfovibrionaceae <sup>46</sup> , <sup>49</sup> , <sup>55</sup> (9)                        | Bifidobacteriaceae <sup>49</sup> , <sup>51</sup> (6)                                            |
|                 | Bacteroidaceae <sup>49</sup> , <sup>51</sup> (6) <sup>54*</sup> (F)                          | Pepto-streptococcaceae <sup>52</sup>                                                            |
|                 | Rikenellaceae <sup>49</sup> , <sup>54*</sup> (F)                                             | Bacteroidales_S24_7_group <sup>52</sup>                                                         |
|                 | Prevotellaceae <sup>46*</sup> <sup>51</sup> (10) <sup>55</sup> (2)                           | S24-7 <sup>49</sup>                                                                             |
|                 | Verrucomicrobiaceae <sup>49</sup> , <sup>55</sup> (2,6,9)                                    | Ruminococcaceae <sup>49</sup>                                                                   |
|                 | Lactobacillaceae <sup>49</sup>                                                               | Enterobacteriaceae <sup>49</sup>                                                                |
|                 | ClostridialesvadinBB60group <sup>51</sup> (6,10) <sup>54*</sup> (F) <sup>55</sup> (9)        | Clostridiaceae <sup>49</sup>                                                                    |
|                 | Erysipelotrichaceae <sup>48</sup> (24) <sup>55</sup> (2)                                     | Helicobacteriaceae <sup>49</sup>                                                                |
|                 | Marinifilaceae <sup>54*</sup> (F)                                                            | [Paraprevotellaceae] <sup>49</sup>                                                              |
|                 | Tannerellaceae <sup>54*</sup> (F)                                                            | Alcaligenaceae <sup>49</sup>                                                                    |
|                 | Coriobacteriaceae <sup>46</sup> (6,8)                                                        | Lachnospiraceae <sup>51</sup> (3) <sup>54*</sup> (F)                                            |
|                 | Bacteroidales_S24_7_group <sup>51</sup> (3,10)                                               | Streptococcaceae <sup>51</sup> (10) <sup>54*</sup> (F)                                          |
|                 | Acidaminococcaceae <sup>51</sup> (3)                                                         | Staphylococcaceae <sup>51</sup> (3,6) <sup>54*</sup> (F)                                        |
|                 | Alcaligenaceae <sup>51</sup> (3)                                                             | Rikenellaceae <sup>48</sup> (24) <sup>55</sup> (6)                                              |
|                 | Unclassified_o_Bacteroidales <sup>51</sup> (3,10)                                            | Carnobacteriaceae <sup>51</sup> (3) <sup>55</sup> (9)                                           |
|                 | Anaeroplasmataceae <sup>51</sup> (6)                                                         | Lactobacillaceae <sup>51</sup> (3)                                                              |
|                 | Porphyromonadaceae <sup>51</sup> (10)                                                        | Aerococcaceae <sup>51</sup> (3)                                                                 |
|                 | Enterobacteriaceae <sup>55</sup> (1,6)                                                       | Desulfovibrionaceae <sup>51</sup> (3)                                                           |
|                 | Bifidobacteriaceae <sup>55</sup> (2)                                                         | Vibrionaceae <sup>51</sup> (3)                                                                  |
|                 |                                                                                              | Fusobacteriaceae <sup>51</sup> (3)                                                              |
|                 |                                                                                              | Family_XIII <sup>51</sup> (3)                                                                   |
|                 |                                                                                              | Clostridiaceae_1 <sup>51</sup> (3)                                                              |
|                 |                                                                                              | Actinomycetaceae <sup>51</sup> (3)                                                              |
|                 |                                                                                              | Family_XI_o_Bacillales <sup>51</sup> (6)                                                        |

|                                   |                                                           |                                                                  |
|-----------------------------------|-----------------------------------------------------------|------------------------------------------------------------------|
|                                   |                                                           | Mycoplasmataceae <sup>51</sup> (10)                              |
|                                   |                                                           | Bacteroidaceae <sup>55</sup> (6)                                 |
| <b>Genera</b>                     | Helicobacter <sup>46, 52, 53</sup>                        | Allobaculum <sup>45, 52</sup>                                    |
|                                   | Bacteroides <sup>49, 50, 51</sup> (6) <sup>54*</sup> (F)  | Akkermansia <sup>45, 52</sup>                                    |
|                                   | Odoribacter <sup>46, 51, 54*</sup> (F)                    | Prevotella <sup>46, 49</sup>                                     |
|                                   | Desulfovibrio <sup>49, 53, 55</sup> (9)                   | Alloprevotella <sup>52, 53</sup>                                 |
|                                   | Mucispirillum <sup>49, 52</sup>                           | RuminococcaceaeUCG_0144 <sup>52, 53</sup>                        |
|                                   | Roseburia <sup>53, 54*</sup> (M)                          | Clostridium <sup>49, 50</sup>                                    |
|                                   | Akkermansia <sup>49, 55</sup> (2,6,9)                     | Ruminococcus <sup>46</sup> (6,8) <sup>47</sup> (8) <sup>49</sup> |
|                                   | Ruminoclostridium <sup>51</sup> (10)                      | Roseburia <sup>50, 51</sup> (10)                                 |
|                                   | Norank_f_Ruminococcaceae <sup>51</sup> (10) <sup>53</sup> | Bifidobacterium <sup>49, 51</sup> (6)                            |
|                                   | Lactobacillus <sup>49</sup>                               | Bacteroides <sup>53, 55</sup> (6)                                |
|                                   | Adlercreutzia <sup>49</sup>                               | Lactobacillus <sup>51</sup> (3) <sup>53</sup>                    |
|                                   | Lactococcus <sup>53</sup>                                 | Alistipes <sup>53, 55</sup> (9)                                  |
|                                   | Eubacterium_xylanophilum_group <sup>53</sup>              | Eubacterium_brachy_group <sup>51</sup> (3) <sup>52</sup>         |
|                                   | Ruminoclostridium_9 <sup>53</sup>                         | Rikenellaceae_RC9_gutgroup <sup>53, 55</sup> (6)                 |
|                                   | Lachnospiraceae_NK4A136_group <sup>53</sup>               | Oscillospira <sup>49</sup>                                       |
|                                   | Unclassified_f_lachnospiraceae <sup>53</sup>              | Helicobacter <sup>49</sup>                                       |
|                                   | Norank_f_lachnospiraceae <sup>53</sup>                    | Anaerostipes <sup>49</sup>                                       |
|                                   | Candidatus_Saccharimonus <sup>53</sup>                    | Blautia <sup>49</sup>                                            |
|                                   | Parabacteroides <sup>51</sup> (3) <sup>54*</sup> (F)      | Eubacterium <sup>50</sup>                                        |
|                                   | Alloprevotella <sup>54*</sup> (M) <sup>55</sup> (2)       | Staphylococcus <sup>51</sup> (3,6) <sup>54*</sup> (F)            |
|                                   | RikenellaceaeRC9gutgroup <sup>54*</sup> (F)               | Turicibacter <sup>54*</sup> (F/M)                                |
|                                   | MuribaculaceaeOther <sup>54*</sup> (F)                    | LachnospiraceaeUCG_006 <sup>54*</sup> (F/M)                      |
|                                   | Christensenellaceae Uncult <sup>54*</sup> (F)             | Faecalibaculum <sup>54*</sup> (F)                                |
|                                   | ClostridialesvadinBB60group <sup>54*</sup> (F)            | Lactococcus <sup>54*</sup> (F)                                   |
|                                   | Negativbacillus <sup>54*</sup> (F)                        | Sporosarcina <sup>54*</sup> (F)                                  |
|                                   | Streptococcus <sup>54*</sup> (M)                          | PrevotellaceaeUCG_001 <sup>54*</sup> (M)                         |
|                                   | Eubacterium_coprostanoligenesgroup <sup>54*</sup> (M)     | Mucispirillum <sup>54*</sup> (M)                                 |
|                                   | Norank_f_Bacteroidales_S24_7_group <sup>51</sup> (3,10)   | Butyricicoccus <sup>47</sup> (8) <sup>51</sup> (3)               |
|                                   | Unclassified_o_Bacteroidales <sup>51</sup> (3,10)         | Enterorhabdus <sup>51</sup> (3)                                  |
|                                   | Ruminococcaceae_NK4A214_group <sup>51</sup> (6)           | Aerococcus <sup>51</sup> (3)                                     |
|                                   | Norank_f_Clostridiales_vadinBB60_group <sup>51</sup> (6)  | Desulfovibrio <sup>51</sup> (3)                                  |
|                                   | Anaerovorax <sup>51</sup> (10)                            | Ignatzschineria <sup>51</sup> (3)                                |
|                                   | Peptococcus <sup>51</sup> (10)                            | unclassified_f_Lachnospiraceae <sup>51</sup> (3)                 |
|                                   | Caproiciproducens <sup>51</sup> (10)                      | Lachnospiraceae_FCS020_group <sup>51</sup> (3)                   |
|                                   | Oscillibacter <sup>51</sup> (10)                          | Jeotgalicoccus <sup>51</sup> (3)                                 |
|                                   | PrevotellaceaeUCG_001 <sup>55</sup> (2)                   | Vibrio <sup>51</sup> (3)                                         |
| Bifidobacterium <sup>55</sup> (2) | Psychrilyobacter <sup>51</sup> (3)                        |                                                                  |

|                |                                                                        |                                                       |
|----------------|------------------------------------------------------------------------|-------------------------------------------------------|
|                | Allobaculum <sup>55</sup> (2)                                          | Ruminococcus_2 <sup>51</sup> (3)                      |
|                | Erysipelatoclostridium <sup>55</sup> (2)                               | Butyrivibrio <sup>51</sup> (3)                        |
|                | LachnospiraceaeUCG_001 <sup>55</sup> (3,9)                             | Ruminococcaceae_UCG_0044 <sup>51</sup> (3)            |
|                | Blautia <sup>55</sup> (6)                                              | Unclassified_f_Erysipelotriachaceae <sup>51</sup> (3) |
|                | Escherichia/Shigella <sup>55</sup> (6)                                 | Granulicatella <sup>51</sup> (3)                      |
|                | Tyzzera <sup>55</sup> (6)                                              | Marvinbryanta <sup>51</sup> (3)                       |
|                | Family_XIII_UCG_001 <sup>55</sup> (6)                                  | Actinomyces <sup>51</sup> (3)                         |
|                | Turicibacter <sup>55</sup> (6)                                         | Lachnoclostridium <sup>51</sup> (3,10)                |
|                | Uncultured_bacterium_f_clostridiales_vadinBB60_group <sup>55</sup> (9) | unclassified_f_Coriobacteriaceae <sup>51</sup> (3,10) |
|                | Ruminococcus_1 <sup>55</sup> (9)                                       | Norank_f_mycoplasmataceae <sup>51</sup> (10)          |
|                |                                                                        | Klebsiella <sup>51</sup> (10)                         |
|                |                                                                        | Streptococcus <sup>51</sup> (10)                      |
|                |                                                                        | Ruminoclostridium_549 <sup>5</sup> (3)                |
|                |                                                                        | RuminococcaceaeUCG_010 <sup>55</sup> (3)              |
|                |                                                                        | [Eubacterium]_nodatum_group <sup>55</sup> (9)         |
|                |                                                                        | Atopostipes <sup>55</sup> (9)                         |
| <b>Species</b> | L acidophilus <sup>52</sup>                                            | B. proteoclasticus <sup>50</sup>                      |
|                | B. fragilis <sup>50</sup>                                              | L. johnsoni <sup>50</sup>                             |
|                | B. thetaiotaomicron <sup>50</sup>                                      | B. pullicaecorum <sup>47</sup> (8)                    |
|                | C. leptum <sup>44</sup> (2)                                            |                                                       |
|                | Desulfovibrio C21_C20 <sup>47</sup> (5)                                |                                                       |

**Supplementary table 2: Microbial taxa are altered in AD mouse models compared to WT mice.** Animal studies that either compare microbiota composition between AD and WT mice at certain time point(s), or that examine alterations with increasing age in AD compared to WT mice. \* indicates a result was observed in AD with increasing age, but not in WT mice. Numbers behind taxa as ( ) indicate this result was only observed at these time points. F or M show a change was only seen in females or males respectively, if both were included in one study.

**Supplementary table 3**

|                                                 | Vogt <i>et al.</i> (2017) <sup>58</sup>    |                 | Zhuang <i>et al.</i> (2018) <sup>59</sup> |                | Haran <i>et al.</i> (2019) <sup>60</sup>                                         |                 | Cattaneo <i>et al.</i> (2017) <sup>61</sup>                                                                                                              |                             |                            |
|-------------------------------------------------|--------------------------------------------|-----------------|-------------------------------------------|----------------|----------------------------------------------------------------------------------|-----------------|----------------------------------------------------------------------------------------------------------------------------------------------------------|-----------------------------|----------------------------|
|                                                 | AD                                         | Control         | AD                                        | Control        | AD                                                                               | Control         | Patients A $\beta$ negative                                                                                                                              | Patients A $\beta$ positive | Control A $\beta$ negative |
| <b>N</b>                                        | 25                                         | 25              | 43                                        | 43             | 24                                                                               | 51              | 33                                                                                                                                                       | 40                          | 10                         |
| <b>age, y (mean <math>\pm</math> SD)</b>        | 71.3 $\pm$ 7.3                             | 69.3 $\pm$ 7.5  | 70.1 $\pm$ 8.8                            | 69.7 $\pm$ 9.2 | 84.7 $\pm$ 8.1                                                                   | 83.0 $\pm$ 10.2 | 71 $\pm$ 7                                                                                                                                               | 70 $\pm$ 7                  | 68 $\pm$ 8                 |
| <b>Sex (% Female)</b>                           | 72%                                        | 68%             | 46.50%                                    | 46.50%         | 83.30%                                                                           | 84.30%          | 83.30%                                                                                                                                                   | 55.55%                      | 60.00%                     |
| <b>APOE <math>\epsilon</math>4 genotype (%)</b> | 72%                                        | 20%             | 39.50%                                    | 23.30%         | <i>Unknown</i>                                                                   | <i>Unknown</i>  | <i>Unknown</i>                                                                                                                                           | <i>Unknown</i>              | <i>Unknown</i>             |
| <b>Ethnicity</b>                                | Caucasian (96%)                            | Caucasian (92%) | Chinese                                   | Chinese        | <i>Unknown</i>                                                                   | <i>Unknown</i>  | <i>Unknown</i>                                                                                                                                           | <i>Unknown</i>              | <i>Unknown</i>             |
| <b>AD diagnosis</b>                             | Clinical diagnosis of 'dementia due to AD' |                 | Clinical diagnosis                        |                | Clinical diagnosis (confirmed by facility medical record and treating physician) |                 | No AD diagnosis, A $\beta$ positivity was based on Amyloid PET, cognitive impairment through clinical assessment including Mini-Mental State Examination |                             |                            |
| <b>Sequencing method</b>                        | 16S rRNA amplicon sequencing               |                 | 16S rRNA amplicon sequencing              |                | Shotgun metagenomic sequencing                                                   |                 | Microbial DNA qPCR Assay Kit                                                                                                                             |                             |                            |

|                                       |                                                                                                                        |                                                                                                                                                                                      |                                                                                                                        |                                                                                                                                                                                                                                                                              |
|---------------------------------------|------------------------------------------------------------------------------------------------------------------------|--------------------------------------------------------------------------------------------------------------------------------------------------------------------------------------|------------------------------------------------------------------------------------------------------------------------|------------------------------------------------------------------------------------------------------------------------------------------------------------------------------------------------------------------------------------------------------------------------------|
| <p><b>Patients recruited from</b></p> | <p>Wisconsin Alzheimer's Disease Research Center (ADRC) &amp; Wisconsin Registry for Alzheimer's Prevention (WRAP)</p> | <p>Daping Hospital, Southwest Hospital of Third Military Medical University, First Affiliated Hospital of Chongqing Medical University &amp; Chongqing People's Hospital (China)</p> | <p>4 nursing home (NH) facilities in central Massachusetts, approved by University of Massachusetts Medical School</p> | <p>A larger study in 18 memory clinics in Eastern Lombardy, Italy, aiming to assess the added value of amyloid imaging in the clinical work-up of patients with cognitive complaints (the Incremental Diagnostic Value of Florbetapir Amyloid Imaging [INDIA-FBP] study)</p> |
|---------------------------------------|------------------------------------------------------------------------------------------------------------------------|--------------------------------------------------------------------------------------------------------------------------------------------------------------------------------------|------------------------------------------------------------------------------------------------------------------------|------------------------------------------------------------------------------------------------------------------------------------------------------------------------------------------------------------------------------------------------------------------------------|

**Supplementary table 3: Characteristics of human studies regarding microbiota composition in AD patients compared to aged-matched control subjects.** Sample size of the studies is listed, together with mean age of the subjects, male/female ratio, % APOEε4 genotype, ethnicity, AD diagnosis of the included patients, the sequencing method used and facilities where the patients were recruited from.

Supplementary table 4

| Therapeutic Intervention | Gut microbiota composition                                                                                                                                                                                                                                                                                                                                                                                                                                                                                                                                                                                                                                                                                                                | Metabolite levels                                                                                                         | Effects on AD pathology                                                 |                                             |                       |                                                                                |                       |                       |                                    |
|--------------------------|-------------------------------------------------------------------------------------------------------------------------------------------------------------------------------------------------------------------------------------------------------------------------------------------------------------------------------------------------------------------------------------------------------------------------------------------------------------------------------------------------------------------------------------------------------------------------------------------------------------------------------------------------------------------------------------------------------------------------------------------|---------------------------------------------------------------------------------------------------------------------------|-------------------------------------------------------------------------|---------------------------------------------|-----------------------|--------------------------------------------------------------------------------|-----------------------|-----------------------|------------------------------------|
|                          |                                                                                                                                                                                                                                                                                                                                                                                                                                                                                                                                                                                                                                                                                                                                           |                                                                                                                           | (Neuro)inflammation                                                     | Aβ pathology                                | Tau pathology         | Cognition                                                                      | Neuronal loss         | Synaptic plasticity   | Oxidative stress                   |
| Probiotics               | <p>↑ <i>B. longum</i> (50<sup>A</sup>)<br/>                     ↑ <i>B. bifidum</i> (128<sup>H</sup>)<br/>                     ↑ <i>Prevotella</i> spp. (50<sup>A</sup>)<br/>                     ↑ <i>Bacteroides</i> spp. (50<sup>A</sup>)<br/>                     ↑ <i>Lactobacillus</i> spp. (50<sup>A</sup>, 128<sup>A</sup>)</p> <p>↓ <i>Eubacterium</i> spp. (50<sup>A</sup>)<br/>                     ↓ <i>Roseburia</i> spp. (50<sup>A</sup>)<br/>                     ↓ <i>Clostridium</i> spp. (50<sup>A</sup>)<br/>                     ↓ <i>B. proteoclasticus</i> (50<sup>A</sup>)<br/>                     ↓ <i>M. formatexigens</i> (50<sup>A</sup>)<br/>                     ↓ <i>L. johnsonii</i> (50<sup>A</sup>)</p> | ↑ Butyrate (via crossfeeding) (50 <sup>A</sup> , 128 <sup>H</sup> )                                                       | ↓ (128 <sup>H</sup> )                                                   | ↓ (50 <sup>A</sup> )                        |                       | ↑ (128 <sup>H</sup> )                                                          |                       |                       | ↓ (128 <sup>H</sup> ) <sup>H</sup> |
| Probiotics + exercise    | <p>↑ <i>L. acidophilus</i> (50<sup>A</sup>)<br/>                     ↑ <i>B. longum</i> (50<sup>A</sup>)<br/>                     ↑ <i>Eubacterium</i> spp. (50<sup>A</sup>)<br/>                     ↑ <i>Roseburia</i> spp. (50<sup>A</sup>)<br/>                     ↑ <i>Lactobacillus</i> spp. (50<sup>A</sup>)<br/>                     ↑ <i>B. proteoclasticus</i> (50<sup>A</sup>)<br/>                     ↑ <i>M. formatexigens</i> (50<sup>A</sup>)</p> <p>↓ <i>Prevotella</i> spp. (50<sup>A</sup>)<br/>                     ↓ <i>Bacteroides</i> spp. (50<sup>A</sup>)<br/>                     ↓ <i>Clostridium</i> spp. (50<sup>A</sup>)<br/>                     ↓ <i>L. johnsonii</i> (50<sup>A</sup>)</p>               | ↑ Butyrate (via crossfeeding) (50 <sup>A</sup> )                                                                          |                                                                         | ↓ (50 <sup>A</sup> )                        |                       | ↑ (50 <sup>A</sup> )                                                           |                       |                       |                                    |
| Prebiotics               | <p>↑ <i>Bifidobacterium</i> (129<sup>H</sup>)<br/>                     ↑ <i>Bacteroidetes</i> (130<sup>A</sup>)<br/>                     ↑ <i>Firmicutes</i> (130<sup>A</sup>)<br/>                     ↑ <i>Lactobacillus</i> (130<sup>A</sup>)</p> <p>*Induces many alterations at phylum, family and genus level (49<sup>A</sup>), including:<br/>                     ↑ <i>Firmicutes</i><br/>                     ↑ <i>Lachnospiraceae</i><br/>                     ↑ <i>Lactobacillus</i></p> <p>↓ <i>Bacteroidetes</i><br/>                     ↓ <i>Bacteroides</i></p>                                                                                                                                                           | ↑ Butyrate (via increase in butyrate producers and crossfeeding) (49 <sup>A</sup> , 129 <sup>H</sup> , 130 <sup>A</sup> ) | ↓ (130 <sup>A</sup> )                                                   | ↓ (130 <sup>A</sup> )                       |                       | ↑ (130 <sup>A</sup> ) (49 <sup>A</sup> )                                       | ↓ (130 <sup>A</sup> ) |                       | ↓ (130 <sup>A</sup> )              |
| Antibiotics              | *Sex-specific changes, including alterations within <i>Bacteroidetes</i> and <i>Firmicutes</i> (134 <sup>A</sup> )                                                                                                                                                                                                                                                                                                                                                                                                                                                                                                                                                                                                                        | ↓ LPS (134 <sup>A</sup> )                                                                                                 | ↓ (132 <sup>M</sup> , 133 <sup>A(M)</sup> )<br>↑ (134 <sup>A(F)</sup> ) | ↓ (132 <sup>A</sup> , 133 <sup>A(M)</sup> ) | ↓ (132 <sup>A</sup> ) | ↑ (135 <sup>H</sup> , 137 <sup>H</sup> )                                       |                       |                       | ↓ (132 <sup>A</sup> )              |
| PSA treatment            |                                                                                                                                                                                                                                                                                                                                                                                                                                                                                                                                                                                                                                                                                                                                           | ↑ PSA (142 <sup>A</sup> , 143 <sup>A</sup> )                                                                              | ↓ (142 <sup>A</sup> , 143 <sup>A</sup> )                                |                                             |                       |                                                                                |                       |                       |                                    |
| Butyrate treatment       | <p>↑ <i>C. tyrobutyricum</i> (145<sup>A</sup>)<br/>                     ↑ <i>C. butyricum</i> (149<sup>A</sup>)<br/>                     ↑ <i>Alloprevotella</i> (149<sup>A</sup>)<br/>                     ↑ S24-7 (149<sup>A</sup>)</p>                                                                                                                                                                                                                                                                                                                                                                                                                                                                                                 | ↑ Butyrate (144-149 <sup>A</sup> )                                                                                        | ↓ (145 <sup>A</sup> , 149 <sup>A</sup> )                                | ↓ (148 <sup>A</sup> )                       | ↓ (147 <sup>A</sup> ) | ↑ (146 <sup>A</sup> , 147 <sup>A</sup> , 148 <sup>A</sup> , 149 <sup>A</sup> ) | ↓ (149 <sup>A</sup> ) | ↑ (147 <sup>A</sup> ) |                                    |

Supplementary Material

|                     |                                                                                                                                                                                                                                                                                                                                                                                                                                                                                                                                                                                                                                                                                                                                                                                                                                                                                                                                                                                                                                                                                                                                                                                                                                                                                                                                                                                                                                                                                  |                                                                                                                                                                     |                                                              |                            |                                             |  |                                             |  |
|---------------------|----------------------------------------------------------------------------------------------------------------------------------------------------------------------------------------------------------------------------------------------------------------------------------------------------------------------------------------------------------------------------------------------------------------------------------------------------------------------------------------------------------------------------------------------------------------------------------------------------------------------------------------------------------------------------------------------------------------------------------------------------------------------------------------------------------------------------------------------------------------------------------------------------------------------------------------------------------------------------------------------------------------------------------------------------------------------------------------------------------------------------------------------------------------------------------------------------------------------------------------------------------------------------------------------------------------------------------------------------------------------------------------------------------------------------------------------------------------------------------|---------------------------------------------------------------------------------------------------------------------------------------------------------------------|--------------------------------------------------------------|----------------------------|---------------------------------------------|--|---------------------------------------------|--|
|                     | <p>↓ <i>Deferribacteres</i> (149<sup>A</sup>)<br/>         ↓ <i>Helicobacteraceae</i> (149<sup>A</sup>)<br/>         ↓ <i>Helicobacter</i> (149<sup>A</sup>)</p>                                                                                                                                                                                                                                                                                                                                                                                                                                                                                                                                                                                                                                                                                                                                                                                                                                                                                                                                                                                                                                                                                                                                                                                                                                                                                                                 |                                                                                                                                                                     |                                                              |                            |                                             |  |                                             |  |
| Calorie restriction | <p>*rescues age-related alterations (54<sup>A (F)</sup>)<br/>         Effects include:<br/>         ↑ <i>Firmicutes</i><br/>         ↓ <i>Bacteroides</i></p>                                                                                                                                                                                                                                                                                                                                                                                                                                                                                                                                                                                                                                                                                                                                                                                                                                                                                                                                                                                                                                                                                                                                                                                                                                                                                                                    | <p>↓ Butyrate (via restriction in carbohydrates (54<sup>A</sup>))</p>                                                                                               | <p>↓ (150<sup>A</sup>)</p>                                   | <p>↓ (151<sup>A</sup>)</p> |                                             |  |                                             |  |
| High fiber diet     | <p>↑ <i>R. bromii</i> (152<sup>H</sup>)<br/>         ↑ <i>Clostridium</i> spp. (152<sup>H</sup>)<br/>         ↑ <i>Bifidobacterium</i> spp. (152<sup>H</sup>)<br/>         ↑ <i>A. hadrus</i> (152<sup>H</sup>)<br/> <br/>         ↓ <i>Ruminococcus</i> spp. (145<sup>A</sup>)<br/>         ↓ <i>Rikenellaceae</i> (145<sup>A</sup>)</p>                                                                                                                                                                                                                                                                                                                                                                                                                                                                                                                                                                                                                                                                                                                                                                                                                                                                                                                                                                                                                                                                                                                                        | <p>↑ Acetate (145<sup>A</sup>, 152<sup>H</sup>)<br/>         ↑ Butyrate (145<sup>A</sup>, 152<sup>H</sup>)</p>                                                      | <p>↓ (145<sup>A</sup>)</p>                                   |                            |                                             |  |                                             |  |
| Mediterranean diet  | <p>↑ <i>F. prausnitzii</i> (157<sup>H</sup>, 159<sup>H</sup>, 160<sup>H</sup>)<br/>         ↑ <i>E. eligens</i> (157<sup>H</sup>)<br/>         ↑ <i>B. cellulosilyticus</i> (157<sup>H</sup>)<br/>         ↑ <i>Lachnospiraceae</i> (159<sup>H</sup>)<br/>         ↑ <i>Eubacterium</i> spp. (160<sup>H</sup>)<br/>         ↑ <i>Roseburia</i> spp. (159<sup>H</sup>)<br/>         ↑ <i>R. hominis</i> (160<sup>H</sup>)<br/>         ↑ <i>B. thetaiotaomicron</i> (160<sup>H</sup>)<br/>         ↑ <i>P. copri</i> (160<sup>H</sup>)<br/>         ↑ <i>A. hadrus</i> (160<sup>H</sup>)<br/> <br/>         ↓ <i>Clostridium</i> spp. (157<sup>H</sup>)<br/>         ↓ <i>C. aerofaciens</i> (157<sup>H</sup>, 160<sup>H</sup>)<br/>         ↓ <i>Ruminococcus</i> spp. (157<sup>H</sup>, 159<sup>H</sup>)<br/>         ↓ <i>R. lactatiformans</i> (159<sup>H</sup>)<br/>         ↓ <i>P. merdae</i> (159<sup>H</sup>)<br/>         ↓ <i>S. thermophilus</i> (159<sup>H</sup>)<br/>         ↓ <i>R. torques</i> (160<sup>H</sup>)<br/>         ↓ <i>F. plautii</i> (159<sup>H</sup>, 160<sup>H</sup>)<br/>         ↓ <i>C. comes</i> (160<sup>H</sup>)<br/>         ↓ <i>D. formicigenerans</i> (160<sup>H</sup>)<br/>         ↓ <i>C. ramosum</i> (160<sup>H</sup>)<br/>         ↓ <i>V. dispar</i> (160<sup>H</sup>)<br/>         ↓ <i>A. lingnae</i> (160<sup>H</sup>)<br/> <br/>         *many effects on microbiota composition described by 161<sup>H</sup>, including:</p> | <p>↑ Acetate (158<sup>H</sup>)<br/>         ↑ Propionate (158<sup>H</sup>)<br/>         ↑ Butyrate (158<sup>H</sup>)<br/>         ↓ serum LPS (162<sup>H</sup>)</p> | <p>↓ (155<sup>H</sup>, 156<sup>H</sup>, 160<sup>H</sup>)</p> |                            | <p>↑ (153<sup>H</sup>, 160<sup>H</sup>)</p> |  | <p>↓ (153<sup>H</sup>, 155<sup>H</sup>)</p> |  |



|                                  |                                                                                                                                                                               |                                |                                          |                                          |                                          |                                          |  |                       |  |
|----------------------------------|-------------------------------------------------------------------------------------------------------------------------------------------------------------------------------|--------------------------------|------------------------------------------|------------------------------------------|------------------------------------------|------------------------------------------|--|-----------------------|--|
|                                  | ↑ <i>Roseburia</i>                                                                                                                                                            |                                |                                          |                                          |                                          |                                          |  |                       |  |
| Fecal microbiota transplantation | *Induces many alterations at phylum, family and genus level (171 <sup>A</sup> ), including:<br>↑ <i>Bacteroidetes</i><br>↑ <i>Erysipelotrichia</i><br>↑ <i>Faecalibaculum</i> | ↑ Butyrate (171 <sup>A</sup> ) | ↓ (171 <sup>A</sup> , 173 <sup>A</sup> ) | ↓ (171 <sup>A</sup> , 173 <sup>A</sup> ) | ↓ (171 <sup>A</sup> , 173 <sup>A</sup> ) | ↑ (171 <sup>A</sup> , 173 <sup>A</sup> ) |  | ↑ (171 <sup>A</sup> ) |  |

**Supplementary table 4: The effects of microbiome-targeting therapeutic interventions on microbiota composition and metabolite levels, and on different aspects of AD pathology.** ↑ indicates improvements in cognition or synaptic plasticity, while ↓ indicates a decrease in neuroinflammation, A $\beta$  or tau pathology, neuronal loss or oxidative stress. “A” or “H” behind a reference demonstrates the results are obtained in animal or human studies respectively, while (F) or (M) shows a result was observed in female or male mice only. “Spp.” behind a genus indicates that several species within this genus were altered. Effects written in grey are anticipated, but not actually measured.
